# Supplementary material
Source: Springer Nature journal article supplement (https://www.springermedizin.de/resource/supplementary/12968_2013_3295_MOESM2_ESM.pdf/9583554)

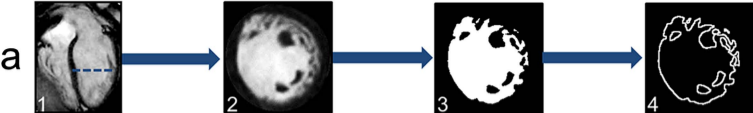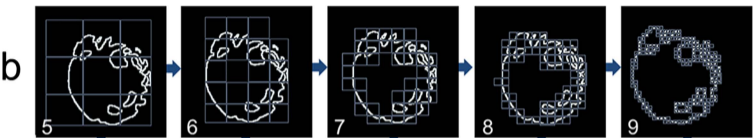

|        |      |      |      |      |      |
|--------|------|------|------|------|------|
| Count: | 9    | 19   | 40   | 81   | 150  |
| Scale: | 0.38 | 0.25 | 0.13 | 0.08 | 0.05 |

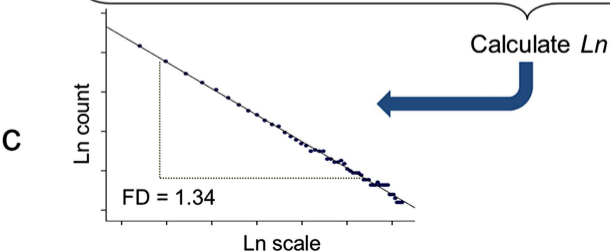

Supplement: MOESM2 [file 9583554]
